# Supplementary material for: Silicon moderated the K deficiency by improving the plant-water status in sorghum
Source: PubMed Central journal article supplement (PMC4785406; doi:10.1038/srep22882), 2016-03-10
Supplement: srep22882-s1.pdf [file srep22882-s1.pdf]

## ***Supplementary Material:***

### **Silicon moderated the K deficiency by improving the plant-water status in sorghum**

Daoqian Chen<sup>†</sup>, Beibei Cao<sup>†</sup>, Shiwen Wang<sup>\*</sup>, Peng Liu, Xiping Deng, Lina Yin, Suiqi Zhang

#### **\* Correspondence:**

Dr. Shiwen Wang

State Key Laboratory of Soil Erosion and Dryland Farming on the Loess Plateau

Institute of Soil and Water Conservation, Northwest A&F University

Xinong Road No. 26,

Yangling, Shaanxi, China. 712100.

[shiwenwang@nwsuaf.edu.cn](mailto:shiwenwang@nwsuaf.edu.cn)

## Supplementary Fig. S1

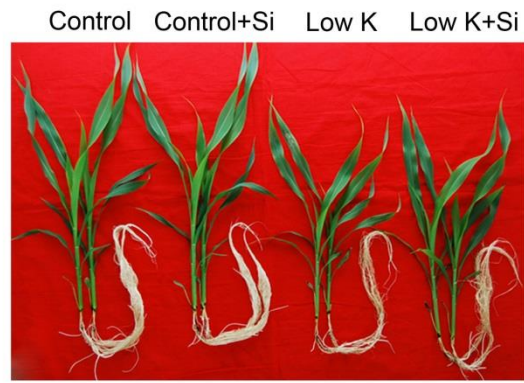

**Fig. S1** Effects of silicon (Si, 1 mM) on the plant growth and phenotype of sorghum plants grown under control (3 mM KCl) and low K (0.05 mM KCl) conditions.

## Supplementary Fig. S2

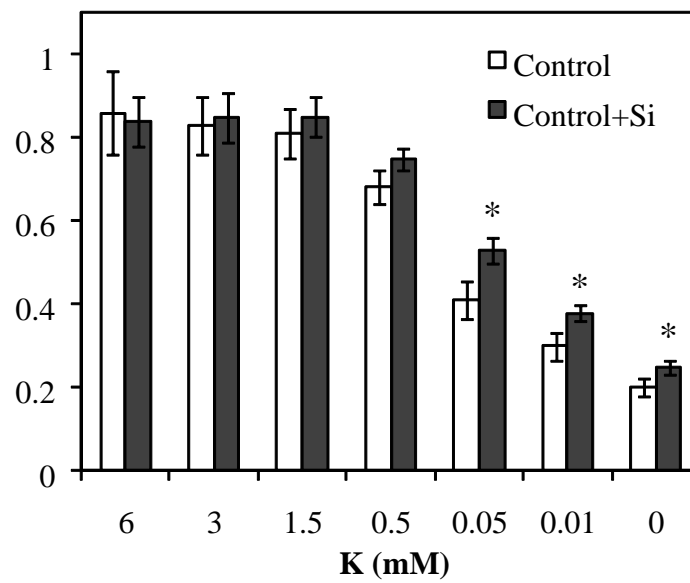

**Fig. S2** Effects of silicon (Si, 1 mM) on the plant dry weight of sorghum plants grown under serial K concentration conditions. The dry weight was measured after 15 days of treatment. Values are presented as the mean  $\pm$  SE (n=10). Asterisk indicate statistically significant differences between Si treatments at  $P < 0.05$ .

**Table S1** Genes and oligonucleotides used in real-time quantitative PCR.

| <b>Gene</b>           | <b>Loci</b> | <b>Primer(5'-3')</b>                          |
|-----------------------|-------------|-----------------------------------------------|
| <i>Actin1</i>         | Sb01g010030 | TGTTCCCTGGGATTGCTG<br>GCCGGACTCATCGTACTCA     |
| <i>PIP1;3/1;4</i>     | Sb06g025150 | AATCGGGTTCGCGGTGTT<br>CCAGGCATGGTTCTGGTTGTA   |
| <i>PIP1;3/1;4 (2)</i> | Sb04g032430 | GTGGAGCTGGAGTGGTGAA<br>GCAAGGATAGGAACATGGGAGT |
| <i>PIP1;5</i>         | Sb04g037800 | TTTCGCCGTCTTCCCTCGTC<br>GGTCGTTCCATGCGTTGG    |
| <i>PIP1;6</i>         | Sb10g007610 | TGACGGTGCTGACGGTGAT<br>GGAGGAGCCCGAAGGTGAC    |
| <i>PIP2;2</i>         | Sb02g010760 | GACTCCCACGTCCCGTTCT<br>CCCAGGGCTTGTCTTGTGT    |
| <i>PIP2;3</i>         | Sb04g026650 | CCGTGACCTTCGGTTTGTTTC<br>GCACGTAGTAGGCGCTCTGG |
| <i>PIP2;5</i>         | Sb06g022840 | TCGCGGTGTTTCATGGTCC<br>TCCCAGGTCTTGTCTGTTGTGT |
| <i>PIP2;6</i>         | Sb02g010800 | CTTCCGATTGGATTGCTGTG<br>CGGAGGACGATCTGGTGGTA  |
| <i>HAK5.1</i>         | Sb03g044790 | TCATTTTACAGCCCAGGAGGA<br>TGCCTCTTGAACCTGATGGA |
| <i>HAK5.2</i>         | Sb06g014930 | TCTACTCCAGCACTTTCCCC<br>CTCCATTGTCTGTTGGCGTAG |
| <i>HAK5.3</i>         | Sb04g021210 | AGTGAGTGGGATCAGGGAGA<br>GCACCGAGAAGAGAAGGAAC  |
| <i>KEA5</i>           | Sb01g048670 | GCCTCCCATCTCCATCTTGT<br>AACCAACGCATAAGGATGCC  |
| <i>KUP3.1</i>         | Sb03g045180 | TACGGGGACCTAAGCACATC<br>ACACCGTCTCCTCATCTTGG  |
| <i>KUP3.2</i>         | Sb02g042430 | GTTGTGCTTGTGGCCTCTT<br>AGCCAGAACAACAATCGG     |
| <i>SKOR1</i>          | Sb10g008960 | ACTGAGCGGTTTAGGGACAA<br>GCTGCTCTCATACTGCAACC  |
| <i>SKOR2</i>          | Sb06g017830 | CCACGGGAGAAGATGGATCA<br>CCTGACTGTGTGGTTGTG    |
| <i>AKT1</i>           | Sb03g029520 | TTTTGCTGTCCACTGTTCGG<br>CCCCGCTGATGAAAATCTGG  |
| <i>RHD2</i>           | Sb05g020380 | GCAGACCTTCTTCGACATGG<br>CGTACTCCTCCGCTTGATCT  |
| <i>CIPK23</i>         | Sb02g003030 | CCCATCCTGGTTCTCCACAA<br>CAAATCTGGGCGGCTGATAC  |
| <i>CBL10</i>          | Sb08g003930 | TCGAGCGTGAAGAGGTGAAA<br>CAGCGTCCTCAAATGTCTTGT |
| <i>CAM1</i>           | Sb01g037010 | TGGAAGGAGGAAACCGTTCA<br>GCAGCAGAGGGACTCAAATG  |
| <i>CAM2</i>           | Sb05g002010 | CGGGCAGATCAACTACAACG<br>GATTGTACAGGAGGGGCAGA  |

|             |             |                                              |
|-------------|-------------|----------------------------------------------|
| <i>AP2</i>  | Sb02g039300 | GCGTCAACATTGGAGGTCTG<br>GATCCTTGAGCTGTTGCGTC |
| <i>ACCO</i> | Sb10g022640 | TCTGTAGGCATCAAGGTGGC<br>GCATCAGTGTGTTCCCTGAG |
| <i>AOC</i>  | Sb01g031870 | CGTGTACGAGATCAACGAGC<br>ACCTTGTTGGTGAAGGGGAC |
| <i>AOS1</i> | Sb01g007000 | GACCATCACCTCGCTCAAGA<br>GACAGACATGGACAACGCAG |
| <i>AOS2</i> | Sb01g042270 | GGACGACCGAATTTGAGCAG<br>CACAAGCTCTCTCGCAAGTC |

---

**Table S2** The protein sequence similarities between putative K<sup>+</sup>-related genes and that in Arabidopsis and rice/maize.

| Gene          | Full name                                                 | Loci        | Description          | Homologous gene in arabidopsis |           |            | Homologous gene in rice/maize      |            |
|---------------|-----------------------------------------------------------|-------------|----------------------|--------------------------------|-----------|------------|------------------------------------|------------|
|               |                                                           |             |                      | Gene                           | Gene ID   | Similarity | Gene                               | Similarity |
| <i>HAK5.1</i> | <i>high affinity K<sup>+</sup> transporter 5.1</i>        | Sb03g044790 | hypothetical protein | <i>HAK5</i>                    | AT4G13420 | 55%        | <i>OsHAK5</i>                      | 82%        |
| <i>HAK5.2</i> | <i>high affinity K<sup>+</sup> transporter 5.2</i>        | Sb06g014930 | hypothetical protein | <i>HAK5</i>                    | AT4G13420 | 55%        | <i>OsHAK5</i>                      | 56%        |
| <i>HAK5.3</i> | <i>high affinity K<sup>+</sup> transporter 5.3</i>        | Sb04g021210 | hypothetical protein | <i>HAK5</i>                    | AT4G13420 | 53%        | <i>OsHAK5</i>                      | 55%        |
| <i>KEA5</i>   | <i>K<sup>+</sup> efflux antiporter 5</i>                  | Sb01g048670 | hypothetical protein | <i>KEA5</i>                    | AT5G51710 | 72%        |                                    |            |
| <i>KUP3.1</i> | <i>K uptake permease 3.1</i>                              | Sb03g045180 | hypothetical protein | <i>KUP3</i>                    | AT3G02050 | 68%        | <i>ZmHAK2</i>                      | 96%        |
| <i>KUP3.2</i> | <i>K uptake permease 3.2</i>                              | Sb02g042430 | hypothetical protein | <i>KUP3</i>                    | AT3G02050 | 66%        | <i>ZmHAK7-like</i>                 | 93%        |
| <i>SKOR1</i>  | <i>stelar K<sup>+</sup> outward rectifier 1</i>           | Sb10g008960 | hypothetical protein | <i>SKOR</i>                    | AT3G02850 | 70%        | <i>OsKOR1</i>                      | 84%        |
| <i>SKOR2</i>  | <i>stelar K<sup>+</sup> outward rectifier 2</i>           | Sb06g017830 | hypothetical protein | <i>SKOR</i>                    | AT3G02850 | 59%        | <i>OsKOR2</i>                      | 82%        |
| <i>AKT1</i>   | <i>Arabidopsis K transporter 1</i>                        | Sb03g029520 | hypothetical protein | <i>AKT1</i>                    | AT2G26650 | 64%        | PREDICTED:<br><i>ZmAKT1-like</i>   | 95%        |
| <i>RHD2</i>   | <i>root hair defective 2</i>                              | Sb05g020380 | hypothetical protein | <i>RHD2</i>                    | AT5G51060 | 63%        | <i>ZmRbohD</i>                     | 90%        |
| <i>CIPK23</i> | <i>CBL-interacting serine/threonine-protein kinase 23</i> | Sb02g003030 | hypothetical protein | <i>CIPK23</i>                  | AT1G30270 | 82%        | <i>OsCIPK23</i>                    | 95%        |
| <i>CBL10</i>  | <i>calcineurin B-like protein 10</i>                      | Sb08g003930 | hypothetical protein | <i>CBL10</i>                   | AT4G33000 | 58%        | <i>OsCBL10</i>                     | 81%        |
| <i>CAM1</i>   | <i>calmodulin 1</i>                                       | Sb01g037010 | hypothetical protein | <i>CaM</i>                     | AT2G41100 | 57%        | <i>ZmCaM1</i>                      | 99%        |
| <i>CAM2</i>   | <i>calmodulin 2</i>                                       | Sb05g002010 | hypothetical protein | <i>CaM</i>                     | AT2G41100 | 49%        | <i>ZmCaM</i>                       | 95%        |
| <i>AP2</i>    | <i>apetala 2</i>                                          | Sb02g039300 | hypothetical protein | <i>AP2</i>                     | AT1G72360 | 33%        |                                    |            |
| <i>ACCO</i>   | <i>ACC oxidase</i>                                        | Sb10g022640 | hypothetical protein | <i>ACC oxidase</i>             | AT2G19590 | 59%        | PREDICTED:<br><i>ACC oxidase 1</i> | 90%        |
| <i>AOS1</i>   | <i>allene oxide synthase 1</i>                            | Sb01g007000 | hypothetical protein | <i>AOS</i>                     | At5g42650 | 59%        | PREDICTED:<br><i>ZmAOS1</i>        | 97%        |
| <i>AOS2</i>   | <i>allene oxide synthase 2</i>                            | Sb01g042270 | hypothetical protein | <i>AOS</i>                     | At5g42650 | 57%        | <i>ZmAOS1</i>                      | 93%        |
| <i>AOC</i>    | <i>allene oxide cyclase</i>                               | Sb01g031870 | hypothetical protein | <i>AOC</i>                     | At3g25760 | 66%        | <i>ZmAOC</i>                       | 86%        |

**Table S3** Effects of silicon (Si, 1 mM) on expression of aquaporin genes and putative genes homologous to Arabidopsis K<sup>+</sup>-related genes in root of sorghum plants with and without Si application grown under control (3 mM KCl) and low K (0.05 mM KCl) conditions. Each treatment includes three replications and each replication includes three technical replications. Values are presented as the mean  $\pm$  SE.

|                      | 6 h            |                |                |                | 8 d            |                |                |                | 12 d           |                |                 |                 |
|----------------------|----------------|----------------|----------------|----------------|----------------|----------------|----------------|----------------|----------------|----------------|-----------------|-----------------|
|                      | Control        | Control+Si     | Low K          | Low K+Si       | Control        | Control+Si     | Low K          | Low K+Si       | Control        | Control+Si     | Low K           | Low K+Si        |
| <i>PIP1.3/1.4</i>    | 1.0 $\pm$ 0.02 | 1.1 $\pm$ 0.12 | 0.7 $\pm$ 0.02 | 0.6 $\pm$ 0.03 | 1.0 $\pm$ 0.02 | 0.9 $\pm$ 0.09 | 0.6 $\pm$ 0.04 | 0.9 $\pm$ 0.04 | 1.0 $\pm$ 0.10 | 1.1 $\pm$ 0.10 | 0.6 $\pm$ 0.21  | 0.9 $\pm$ 0.11  |
| <i>PIP1.3/1.4(2)</i> | 1.0 $\pm$ 0.05 | 1.2 $\pm$ 0.10 | 0.9 $\pm$ 0.02 | 0.8 $\pm$ 0.02 | 1.0 $\pm$ 0.08 | 0.8 $\pm$ 0.05 | 0.5 $\pm$ 0.02 | 0.8 $\pm$ 0.02 | 1.0 $\pm$ 0.06 | 1.1 $\pm$ 0.07 | 0.6 $\pm$ 0.08  | 1.6 $\pm$ 0.10  |
| <i>PIP1.5</i>        | 1.0 $\pm$ 0.02 | 1.1 $\pm$ 0.03 | 0.7 $\pm$ 0.03 | 0.6 $\pm$ 0.03 | 1.0 $\pm$ 0.15 | 1.2 $\pm$ 0.05 | 0.9 $\pm$ 0.02 | 1.1 $\pm$ 0.05 | 1.0 $\pm$ 0.03 | 1.1 $\pm$ 0.05 | 1.0 $\pm$ 0.10  | 1.2 $\pm$ 0.06  |
| <i>PIP1.6</i>        | 1.0 $\pm$ 0.01 | 1.0 $\pm$ 0.03 | 0.4 $\pm$ 0.02 | 0.9 $\pm$ 0.06 | 1.0 $\pm$ 0.02 | 0.6 $\pm$ 0.04 | 0.5 $\pm$ 0.05 | 0.7 $\pm$ 0.07 | 1.0 $\pm$ 0.02 | 0.6 $\pm$ 0.04 | 0.3 $\pm$ 0.09  | 0.9 $\pm$ 0.09  |
| <i>PIP2.2</i>        | 1.0 $\pm$ 0.05 | 1.1 $\pm$ 0.10 | 0.9 $\pm$ 0.06 | 1.0 $\pm$ 0.03 | 1.0 $\pm$ 0.04 | 0.9 $\pm$ 0.01 | 0.4 $\pm$ 0.02 | 0.6 $\pm$ 0.02 | 1.0 $\pm$ 0.02 | 1.4 $\pm$ 0.02 | 0.9 $\pm$ 0.05  | 1.6 $\pm$ 0.05  |
| <i>PIP2.3</i>        | 1.0 $\pm$ 0.01 | 0.9 $\pm$ 0.04 | 0.7 $\pm$ 0.04 | 0.7 $\pm$ 0.05 | 1.0 $\pm$ 0.04 | 0.7 $\pm$ 0.01 | 0.4 $\pm$ 0.02 | 0.7 $\pm$ 0.02 | 1.0 $\pm$ 0.02 | 0.8 $\pm$ 0.01 | 0.5 $\pm$ 0.01  | 1.2 $\pm$ 0.07  |
| <i>PIP2.5</i>        | 1.0 $\pm$ 0.01 | 1.1 $\pm$ 0.02 | 0.7 $\pm$ 0.01 | 0.9 $\pm$ 0.02 | 1.0 $\pm$ 0.05 | 0.9 $\pm$ 0.02 | 0.8 $\pm$ 0.03 | 0.8 $\pm$ 0.03 | 1.0 $\pm$ 0.04 | 1.0 $\pm$ 0.02 | 0.7 $\pm$ 0.17  | 1.0 $\pm$ 0.08  |
| <i>PIP2.6</i>        | 1.0 $\pm$ 0.10 | 1.0 $\pm$ 0.20 | 1.0 $\pm$ 0.10 | 2.1 $\pm$ 0.31 | 1.0 $\pm$ 0.03 | 1.2 $\pm$ 0.03 | 0.7 $\pm$ 0.04 | 0.9 $\pm$ 0.13 | 1.0 $\pm$ 0.06 | 1.2 $\pm$ 0.03 | 0.9 $\pm$ 0.08  | 1.2 $\pm$ 0.19  |
| <i>HAK5.1</i>        | 1.0 $\pm$ 0.03 | 0.9 $\pm$ 0.07 | 0.5 $\pm$ 0.02 | 1.1 $\pm$ 0.05 | 1.0 $\pm$ 0.17 | 1.0 $\pm$ 0.05 | 1.9 $\pm$ 0.14 | 1.0 $\pm$ 0.14 | 1.0 $\pm$ 0.07 | 0.9 $\pm$ 0.03 | 0.9 $\pm$ 0.12  | 0.9 $\pm$ 0.08  |
| <i>HAK5.2</i>        | 1.0 $\pm$ 0.04 | 0.9 $\pm$ 0.07 | 1.0 $\pm$ 0.05 | 1.1 $\pm$ 0.06 | 1.0 $\pm$ 0.13 | 0.9 $\pm$ 0.03 | 2.4 $\pm$ 0.81 | 1.0 $\pm$ 0.04 | 1.0 $\pm$ 0.05 | 1.0 $\pm$ 0.05 | 7.0 $\pm$ 0.55  | 4.4 $\pm$ 0.09  |
| <i>HAK5.3</i>        | 1.0 $\pm$ 0.12 | 0.8 $\pm$ 0.07 | 0.8 $\pm$ 0.07 | 0.9 $\pm$ 0.08 | 1.0 $\pm$ 0.11 | 1.0 $\pm$ 0.18 | 1.8 $\pm$ 0.30 | 0.7 $\pm$ 0.08 | 1.0 $\pm$ 0.12 | 1.0 $\pm$ 0.03 | 0.6 $\pm$ 0.07  | 0.5 $\pm$ 0.07  |
| <i>KEA</i>           | 1.0 $\pm$ 0.01 | 0.8 $\pm$ 0.02 | 0.9 $\pm$ 0.04 | 1.0 $\pm$ 0.02 | 1.0 $\pm$ 0.04 | 0.9 $\pm$ 0.02 | 0.8 $\pm$ 0.05 | 0.8 $\pm$ 0.01 | 1.0 $\pm$ 0.04 | 1.0 $\pm$ 0.18 | 1.3 $\pm$ 0.08  | 0.9 $\pm$ 0.02  |
| <i>KUP3.1</i>        | 1.0 $\pm$ 0.03 | 1.0 $\pm$ 0.04 | 0.8 $\pm$ 0.02 | 0.8 $\pm$ 0.04 | 1.0 $\pm$ 0.04 | 0.9 $\pm$ 0.04 | 0.9 $\pm$ 0.02 | 0.9 $\pm$ 0.02 | 1.0 $\pm$ 0.03 | 1.0 $\pm$ 0.02 | 1.8 $\pm$ 0.09  | 1.5 $\pm$ 0.08  |
| <i>KUP3.2</i>        | 1.0 $\pm$ 0.05 | 1.1 $\pm$ 0.11 | 0.8 $\pm$ 0.06 | 1.0 $\pm$ 0.06 | 1.0 $\pm$ 0.07 | 0.9 $\pm$ 0.04 | 0.9 $\pm$ 0.06 | 0.9 $\pm$ 0.03 | 1.0 $\pm$ 0.01 | 0.9 $\pm$ 0.04 | 3.3 $\pm$ 0.27  | 2.9 $\pm$ 0.49  |
| <i>SKOR1</i>         | 1.0 $\pm$ 0.02 | 0.9 $\pm$ 0.08 | 0.8 $\pm$ 0.08 | 0.8 $\pm$ 0.03 | 1.0 $\pm$ 0.01 | 1.0 $\pm$ 0.02 | 0.8 $\pm$ 0.10 | 2.2 $\pm$ 0.02 | 1.0 $\pm$ 0.05 | 0.9 $\pm$ 0.02 | 1.4 $\pm$ 0.02  | 2.8 $\pm$ 0.10  |
| <i>SKOR2</i>         | 1.0 $\pm$ 0.03 | 1.1 $\pm$ 0.18 | 0.8 $\pm$ 0.07 | 0.9 $\pm$ 0.01 | 1.0 $\pm$ 0.03 | 0.9 $\pm$ 0.02 | 1.0 $\pm$ 0.05 | 1.3 $\pm$ 0.14 | 1.0 $\pm$ 0.10 | 1.1 $\pm$ 0.04 | 1.2 $\pm$ 0.38  | 2.1 $\pm$ 0.16  |
| <i>AKT1</i>          | 1.0 $\pm$ 0.05 | 0.8 $\pm$ 0.05 | 0.9 $\pm$ 0.02 | 0.9 $\pm$ 0.04 | 1.0 $\pm$ 0.14 | 0.8 $\pm$ 0.02 | 1.0 $\pm$ 0.04 | 0.9 $\pm$ 0.03 | 1.0 $\pm$ 0.02 | 1.0 $\pm$ 0.20 | 1.6 $\pm$ 0.07  | 1.1 $\pm$ 0.06  |
| <i>RHD</i>           | 1.0 $\pm$ 0.10 | 0.7 $\pm$ 0.07 | 1.0 $\pm$ 0.08 | 0.9 $\pm$ 0.03 | 1.0 $\pm$ 0.02 | 0.9 $\pm$ 0.11 | 2.1 $\pm$ 0.15 | 1.1 $\pm$ 0.14 | 1.0 $\pm$ 0.09 | 1.0 $\pm$ 0.02 | 1.9 $\pm$ 0.05  | 1.5 $\pm$ 0.19  |
| <i>CIPK</i>          | 1.0 $\pm$ 0.06 | 1.0 $\pm$ 0.01 | 1.0 $\pm$ 0.09 | 1.0 $\pm$ 0.05 | 1.0 $\pm$ 0.02 | 1.1 $\pm$ 0.03 | 6.0 $\pm$ 0.56 | 4.1 $\pm$ 0.67 | 1.0 $\pm$ 0.01 | 0.9 $\pm$ 0.03 | 27.8 $\pm$ 3.68 | 14.6 $\pm$ 1.38 |
| <i>CBL10</i>         | 1.0 $\pm$ 0.02 | 1.2 $\pm$ 0.06 | 1.1 $\pm$ 0.02 | 1.0 $\pm$ 0.02 | 1.0 $\pm$ 0.01 | 1.0 $\pm$ 0.02 | 1.3 $\pm$ 0.07 | 1.1 $\pm$ 0.06 | 1.0 $\pm$ 0.01 | 1.2 $\pm$ 0.05 | 1.9 $\pm$ 0.21  | 1.3 $\pm$ 0.03  |
| <i>CAM1</i>          | 1.0 $\pm$ 0.04 | 0.9 $\pm$ 0.04 | 0.8 $\pm$ 0.05 | 1.0 $\pm$ 0.04 | 1.0 $\pm$ 0.09 | 1.0 $\pm$ 0.05 | 1.4 $\pm$ 0.05 | 1.8 $\pm$ 0.27 | 1.0 $\pm$ 0.02 | 1.0 $\pm$ 0.04 | 1.2 $\pm$ 0.13  | 1.4 $\pm$ 0.20  |
| <i>CAM2</i>          | 1.0 $\pm$ 0.10 | 1.1 $\pm$ 0.07 | 0.9 $\pm$ 0.08 | 0.9 $\pm$ 0.03 | 1.0 $\pm$ 0.02 | 1.0 $\pm$ 0.11 | 1.7 $\pm$ 0.05 | 1.3 $\pm$ 0.24 | 1.0 $\pm$ 0.09 | 1.4 $\pm$ 0.02 | 1.3 $\pm$ 0.05  | 1.1 $\pm$ 0.19  |
| <i>AP2</i>           | 1.0 $\pm$ 0.06 | 0.8 $\pm$ 0.20 | 0.9 $\pm$ 0.03 | 0.9 $\pm$ 0.03 | 1.0 $\pm$ 0.11 | 0.7 $\pm$ 0.08 | 1.2 $\pm$ 0.03 | 0.7 $\pm$ 0.03 | 1.0 $\pm$ 0.05 | 1.2 $\pm$ 0.06 | 1.1 $\pm$ 0.28  | 0.9 $\pm$ 0.10  |
| <i>ACCO</i>          | 1.0 $\pm$ 0.06 | 0.7 $\pm$ 0.05 | 1.0 $\pm$ 0.04 | 0.9 $\pm$ 0.02 | 1.0 $\pm$ 0.01 | 0.8 $\pm$ 0.04 | 2.7 $\pm$ 0.18 | 1.1 $\pm$ 0.01 | 1.0 $\pm$ 0.09 | 1.0 $\pm$ 0.01 | 2.0 $\pm$ 0.21  | 1.5 $\pm$ 0.06  |
| <i>AOC</i>           | 1.0 $\pm$ 0.10 | 0.8 $\pm$ 0.03 | 0.9 $\pm$ 0.03 | 0.7 $\pm$ 0.14 | 1.0 $\pm$ 0.02 | 0.7 $\pm$ 0.05 | 0.9 $\pm$ 0.01 | 0.8 $\pm$ 0.03 | 1.0 $\pm$ 0.10 | 1.0 $\pm$ 0.02 | 1.2 $\pm$ 0.04  | 1.3 $\pm$ 0.12  |
| <i>AOS1</i>          | 1.0 $\pm$ 0.06 | 1.2 $\pm$ 0.08 | 1.1 $\pm$ 0.02 | 0.8 $\pm$ 0.02 | 1.0 $\pm$ 0.04 | 0.9 $\pm$ 0.01 | 1.3 $\pm$ 0.13 | 1.0 $\pm$ 0.08 | 1.0 $\pm$ 0.07 | 1.2 $\pm$ 0.04 | 1.2 $\pm$ 0.03  | 0.9 $\pm$ 0.09  |
| <i>AOS2</i>          | 1.0 $\pm$ 0.04 | 0.8 $\pm$ 0.03 | 0.8 $\pm$ 0.11 | 0.7 $\pm$ 0.07 | 1.0 $\pm$ 0.02 | 0.9 $\pm$ 0.01 | 0.9 $\pm$ 0.04 | 0.7 $\pm$ 0.03 | 1.0 $\pm$ 0.02 | 0.9 $\pm$ 0.02 | 1.7 $\pm$ 0.27  | 1.6 $\pm$ 0.03  |
